# Supplementary material for: Mechanism of Cellular Production and in Vivo Seeding Effects of Hexameric β-Amyloid Assemblies
Source: Research Square preprint supplement (doi:10.21203/rs.3.rs-138906/v1), 2021-01-08

# Additional File 1

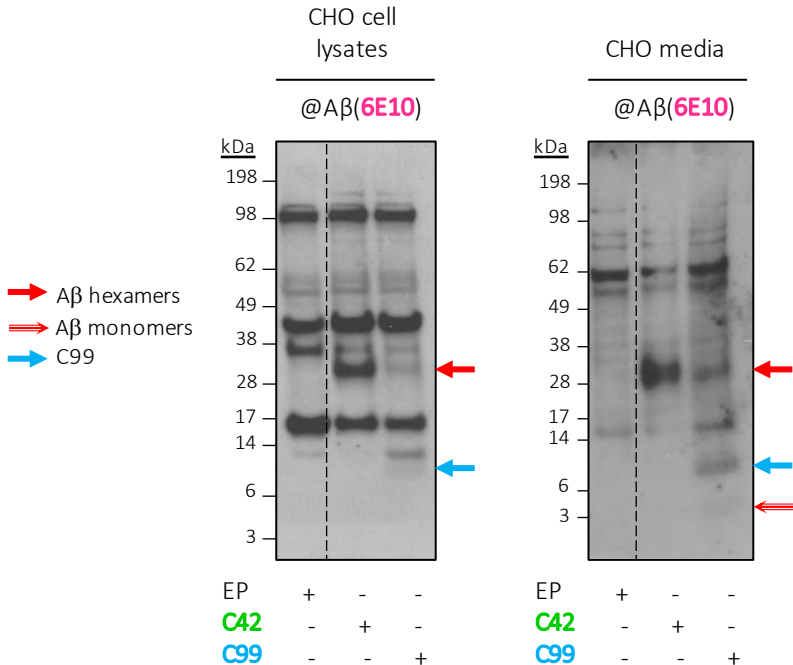

Supplement: Supplementary file [file a2d469d3de44d6363ef4857c.pdf]
